# Supplementary material for: A primary effect of palmitic acid on mouse oocytes is the disruption of the structure of the endoplasmic reticulum
Source: PubMed Central journal article supplement (PMC8801006; doi:10.1530/rep-21-0332), 2021-12-03
Supplement: supplementary_figure_1.pdf [file supplementary_figure_1.pdf]

### Supplementary Figure 1.

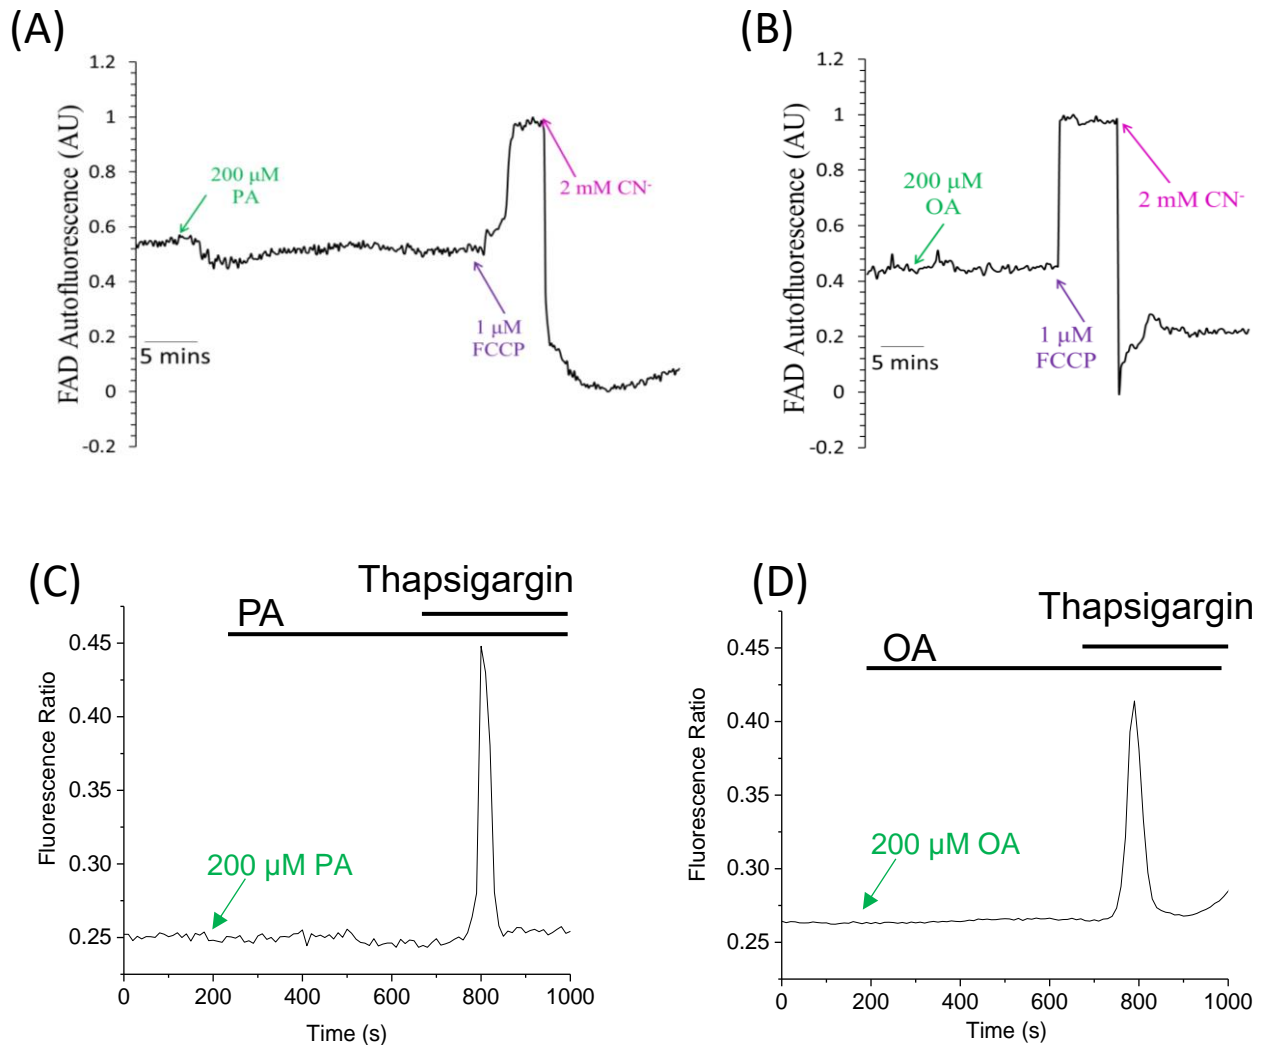

#### Figure S1. Transient effects of FA and OA on mitochondrial metabolism and intracellular $\text{Ca}^{2+}$ stores of immature oocytes.

Example trace of mitochondrial FAD autofluorescence signal in immatures GV stage oocytes after adding 200  $\mu\text{M}$  PA (A) or 200  $\mu\text{M}$  OA (B). The oocytes were then subjected to induction of maximum reduction (2 mM cyanide) followed by subsequent maximum oxidation (1  $\mu\text{M}$  FCCP). Data represent multiple eggs ( $n = 19$  or  $21$  for PA or OA condition respectively), using four mice trials. In part C and D immatures GV stage oocytes were injected with a mixture OGBD and Alexa594 for ratio-metric fluorescent measure of intracellular  $\text{Ca}^{2+}$  store. The example trace showed the  $\text{Ca}^{2+}$  response of the oocyte after adding 200  $\mu\text{M}$  PA (C) or 200  $\mu\text{M}$  OA (D). For both experiments, thapsigargin (10  $\mu\text{M}$ ) was then added to induce a transient  $\text{Ca}^{2+}$  response. Data represent multiple oocytes ( $n = 11$  or  $18$  for PA or OA condition respectively), from four independent trials.
