# Supplementary material for: A primary effect of palmitic acid on mouse oocytes is the disruption of the structure of the endoplasmic reticulum
Source: PubMed Central journal article supplement (PMC8801006; doi:10.1530/rep-21-0332), 2021-12-03
Supplement: supplementary_figure_2.pdf [file supplementary_figure_2.pdf]

### Supplementary Figure 2.

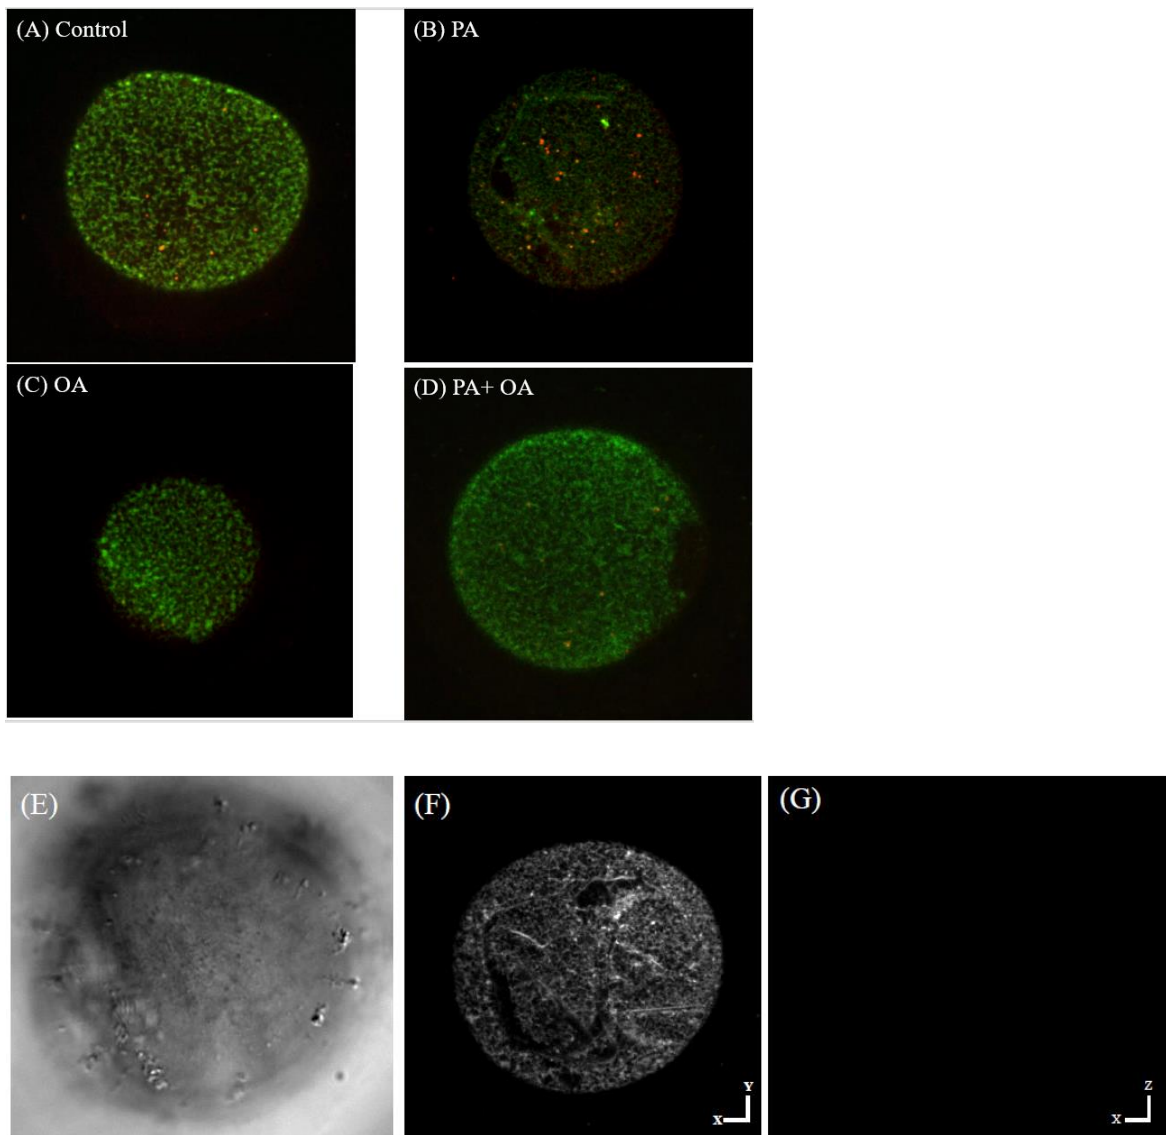

**Figure S2. CARS and TPF 3D images in MII oocytes.**

Immatures GV stage oocytes were incubated in standard M2 medium (A) supplemented with 200  $\mu$ M PA (B), 200  $\mu$ M OA (C), or combination of 200  $\mu$ M PA and 200  $\mu$ M OA (D) for overnight. MII oocytes (eggs) were then selected and injected with Neuro DiI in soybean oil droplet. Z-stack of CARS (red) and TFP (green) images of the eggs were simultaneously acquired and showed as z stack of false-coloured overlays here. In E, F and G, images are shown of a GV stage oocytes incubated in M2 medium supplemented with 200  $\mu$ M PA and injected with Neuro DiI in soybean oil droplet. There is a Z-stack of the DIC image (E) and TFP fluorescence images of the eggs (in F) also shown as a z stack.
