# Supplementary material for: A primary effect of palmitic acid on mouse oocytes is the disruption of the structure of the endoplasmic reticulum
Source: PubMed Central journal article supplement (PMC8801006; doi:10.1530/rep-21-0332), 2021-12-03
Supplement: supplementary_figure_3.pdf [file supplementary_figure_3.pdf]

### Supplementary Figure 3.

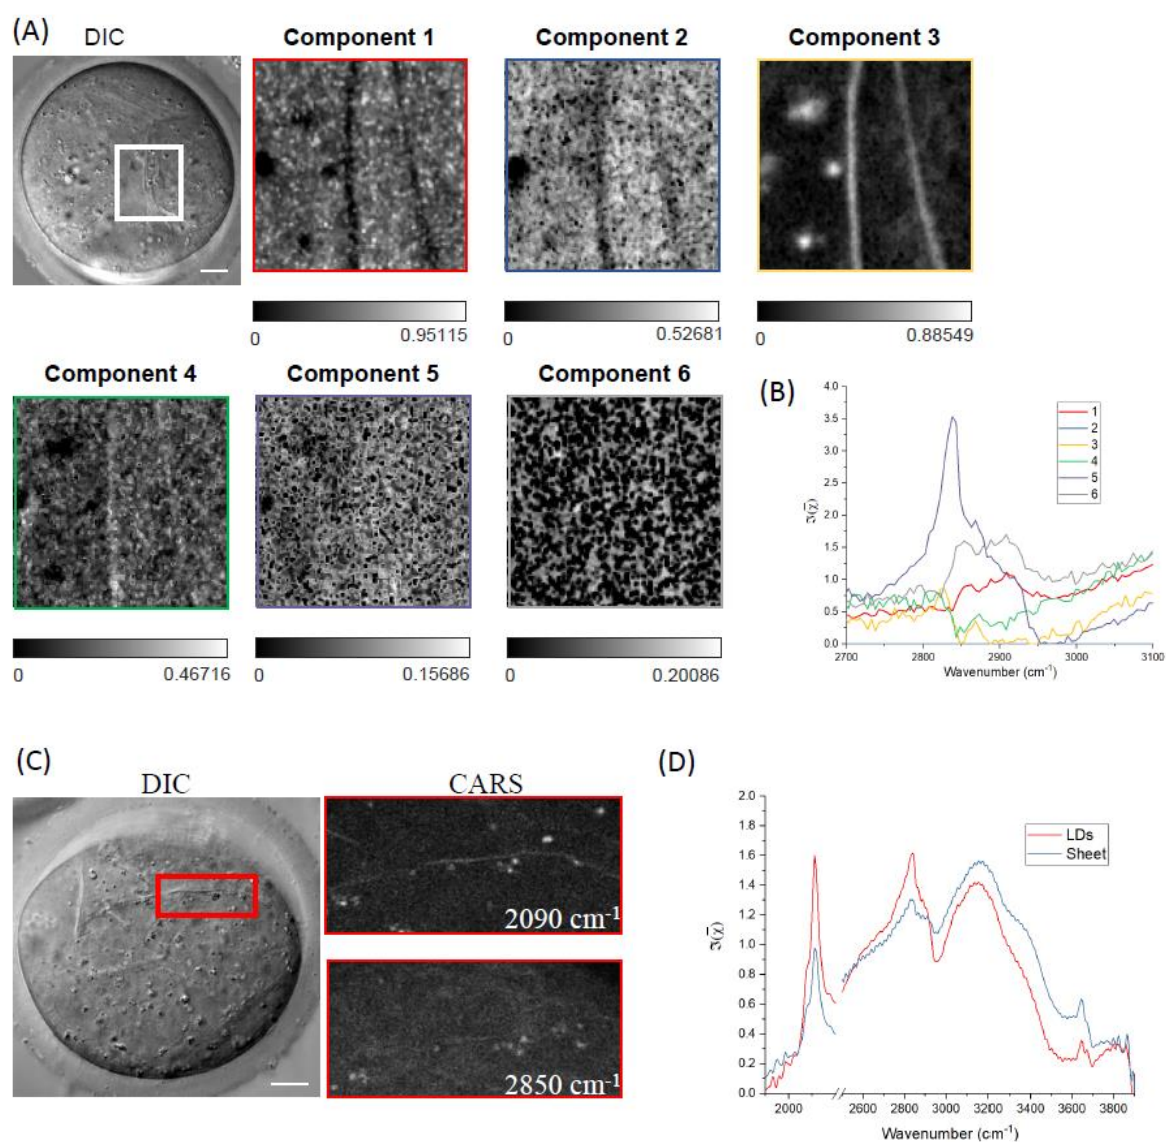

**Figure S3. Hyperspectral imaging of chemical content in PA treated oocytes.**

Spatial and spectral outputs from unsupervised FSC<sup>3</sup> analysis of hyperspectral CARS datasets for oocytes matured in 200  $\mu\text{M}$  PA. The concentration maps (A) identify and spatially resolve six components which are chemically specified by their representative spectra showing the phase-retrieved imaginary part of the normalised CARS susceptibility  $\Im(\chi^{(2)})$ . Component 3 is identified corresponding to fatty acid since it has the characteristic peak at 2850  $\text{cm}^{-1}$  (B). Volume concentration ranges are shown on a grayscale. DIC images show whole cells and the lipid-rich regions selected for hyperspectral CARS acquisition. Scale bars show 20  $\mu\text{m}$  in DIC images and 4  $\mu\text{m}$  in FSC<sup>3</sup> images (except for lowest row which shows 2  $\mu\text{m}$ ). (C) and (D) are CARS hyperspectral images of oocytes incubated in DPA (deuterated palmitic acid) overnight. Mature oocytes (eggs) were then selected for DIC and CARS images at wavenumber 2850  $\text{cm}^{-1}$  and at wavenumber 2090  $\text{cm}^{-1}$  (C). Hyperspectral CARS images of the selected area (red outline) were acquired and analysed by HIA (details in the method section; and the spectra of the areas contain the LD (red) and sheet-structure (blue) are shown in (D).
